# Supplementary material for: AA-NAT, MT1 and MT2 Correlates with Cancer Stem-Like Cell Markers in Colorectal Cancer: Study of the Influence of Stage and p53 Status of Tumors
Source: PubMed Central journal article supplement (PMC5486074; doi:10.3390/ijms18061251), 2017-06-11
Supplement: ijms-18-01251-s001.pdf [file ijms-18-01251-s001.pdf]

**Supplementary Table 1.** P53 mutations.

| Type of TP53 mutation           | Number of patients with the mutation | Exon                  |
|---------------------------------|--------------------------------------|-----------------------|
| c.375G>A (p?)                   | 1                                    | 4                     |
| c.404G>T (p.C135F)              | 2                                    | 5                     |
| c.422G>A (p.C141Y)              | 1                                    | 5                     |
| c.423C>G (p.C141W)              | 1                                    | 5                     |
| c.438G>A (p.W146X)              | 1                                    | 5                     |
| c.455C>T (p.P152L)              | 2                                    | 5                     |
| c.481G>T (p.A161S)              | 1                                    | 5                     |
| c.488A>G (p.Y163C)              | 4                                    | 5                     |
| c.510G> (p.T170X)               | 1                                    | 5                     |
| c.517G>T (p.V173L)              | 2                                    | 5                     |
| c.515T>G (p.V172G)              | 1                                    | 5                     |
| c.520A>T (p.R174W)              | 1                                    | 5                     |
| c.524G>A (p.R175H)              | 8                                    | 5                     |
| c.526_52del (p.C176X)           | 1                                    | 5                     |
| c.527G>T (p.C176F)              | 1                                    | 5                     |
| c.536A>G (p.H179R)              | 1                                    | 5                     |
| c.584T>C (p.I195T)              | 1                                    | 6                     |
| c.632C>T (p.T211I)              | 1                                    | 6                     |
| c.637C>T (p.R213X)              | 5                                    | 6                     |
| c.659A>G (p.Y220C)              | 1                                    | 6                     |
| c.672+2T (p ?)                  | 1                                    | Intron 6 <sup>b</sup> |
| c.713G>A (p.C238Y)              | 2                                    | 7                     |
| c.733G>A (p.G245S)              | 4                                    | 7                     |
| c.734G>A (p.G245D)              | 2                                    | 7                     |
| c.742C>T (p.R248W)              | 2                                    | 7                     |
| c.743G>A (p.R248Q)              | 4                                    | 7                     |
| c.745A>T p.R249W                | 1                                    | 7                     |
| c.757_75del (p.T253X)           | 1                                    | 7                     |
| c.775G>T (p.D259Y)              | 1                                    | 7                     |
| c.783-1G (p?)                   | 1                                    | Intron 7 <sup>b</sup> |
| c.797G>A (p.G266E)              | 1                                    | 8                     |
| c.811G>A (p.E271K)              | 2                                    | 8                     |
| c.814G>A (p.V272M)              | 2                                    | 8                     |
| c.817C>T (p.R273C)              | 4                                    | 8                     |
| c.818G>A (p.R273H)              | 5                                    | 8                     |
| c.818G>C (p.R273P)              | 1                                    | 8                     |
| c.844C>T (p.R282W)              | 2                                    | 8                     |
| c.853G>A (p.E285K)              | 1                                    | 8                     |
| c.919+1G (p?)                   | 1                                    | Intron 8 <sup>b</sup> |
| c.904G>T (p.G302W) <sup>a</sup> | 1                                    | 8                     |

To report mutations, we followed the recommendations provided by the Human Gene Variation Society (HGVS).

<sup>a</sup>Mutation was considered and calculated as wild type due to transactivation activity > 75%.

<sup>b</sup>Three mutations, though located in the introns, had a predicted effect on splicing and were classified as mutant

**Supplementary Table 2.** Characteristics of the patients included in the study

| <b>CHARACTERISTIC</b>     | <b>N (%)</b> |
|---------------------------|--------------|
| <b>Gender</b>             |              |
| Female                    | 110 (60)     |
| Male                      | 73 (40)      |
| <b>Location</b>           |              |
| Colon                     | 174 (95)     |
| Rectum                    | 9 (5)        |
| <b>Histological type</b>  |              |
| Well differentiated       | 45 (24.4)    |
| Moderately differentiated | 113 (61.6)   |
| Poorly differentiated     | 25 (14.0)    |
| <b>pTMN Stage</b>         |              |
| Stage I                   | 23 (12.4)    |
| Stage II                  | 73 (39.9)    |
| Stage III                 | 74 (40.4)    |
| Stage IV                  | 13 (7.3)     |

**Supplementary Table 3.** Primers used to determine AA-NAT, MT1, MT2, CD44 and CD66c expression.

| <b>Gene</b> | <b>Forward</b>                | <b>Reverse</b>                 | <b>Product size (bp)</b> |
|-------------|-------------------------------|--------------------------------|--------------------------|
| AA-NAT      | tcctgccagtgagttcgctgcctcac    | tgtcccagagcgagccgatgatgaaggc   | 206                      |
| MT1         | ttgtccttttgccatttgctgggctcctc | gtcatcagtgagacggttccatttaacc   | 289                      |
| MT2         | gtggtgttgatcttgccatctgctgg    | agcatctgcctggtgctgcacaccaatgat | 321                      |
| CD44        | gcttcaatagcacctgccacaatgg     | aaagaggtcctgtcctgtccaaatcttc   | 594                      |
| CD66c       | accagtcacctgaatgtcctctatgg    | gacaggagcactccagagactgtgatc    | 293                      |
| UBC         | tgggatgcaaatctcgtgaagacctgac  | accaagtgcagatggactcttctggatg   | 213                      |

**Supplementary Table 4.** Primers used to analyze p53 mutations

| Exons | Primers                         |                                | Product Size<br>(pb) |
|-------|---------------------------------|--------------------------------|----------------------|
|       | Sense                           | Antisense                      |                      |
| 2-4   | agctgtctcagacactggcatggtgttg    | cactgacaggaagccaagggtgaagagg   | 840                  |
| 5-6   | gttgctttatctgttcactgtgcctgac    | tagggaggtcaatatagcagcaggagaaag | 548                  |
| 7-9   | cagcctgggacagagcgagattccatc     | aaccaggagccattgtctttgaggcatcac | 987                  |
| 10    | tacttgaagtgcagtttctactaaatgcatg | Aggaagactaaaaaatgtctgtgcagggc  | 393                  |
